# Supplementary material for: Control of bacterial biofilms with marine alkaloid derivatives
Source: Royal Society of Chemistry journal article supplement (doi:10.1039/b719989a), 2008-02-21

## Supporting Information

### Control of Bacterial Biofilms with Marine Alkaloid Derivatives

Robert W. Huigens III,<sup>1</sup> Luyan Ma,<sup>2</sup> Christopher Gambino,<sup>1</sup> Peter D. R. Moeller,<sup>3</sup> Anne Basso,<sup>1</sup>  
John Cavanagh,<sup>4</sup> Daniel J. Wozniak,<sup>2</sup> and Christian Melander<sup>1\*</sup>

*1. Department of Chemistry, North Carolina State University, Raleigh, NC 27695. 2. Department of Microbiology and Immunology, Wake Forest University School of Medicine, Winston-Salem, NC 27157. 3. Center for Coastal Environmental Health and Biomolecular Research, National Oceanic and Atmospheric Administration National Ocean Service, Hollings Marine Laboratory, Charleston, South Carolina 29412 4. Department of Molecular and Structural Biochemistry, North Carolina State University, Raleigh, NC 27695.*

#### Dose-Response Curves for Biofilm Inhibition:

Dose-response curves were generated on the percent inhibition determined by the static inhibition/crystal violet stain assay and used to determine the IC<sub>50</sub> values for active compounds.

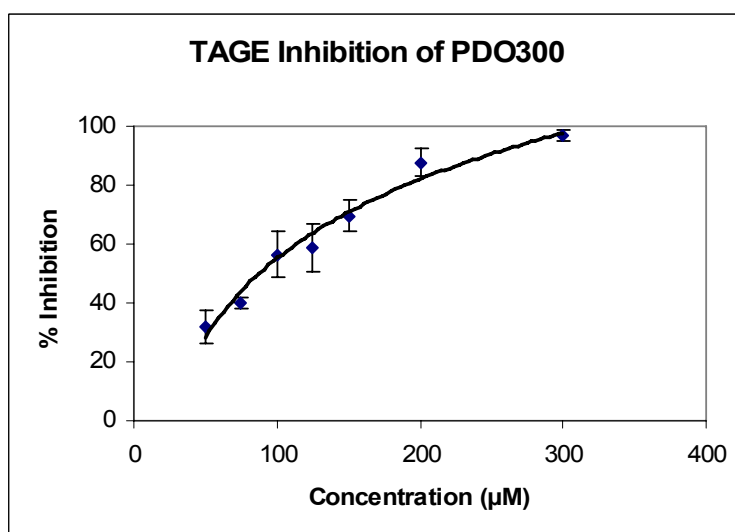

# Supplementary Material (ESI) for Molecular BioSystems  
# This journal is (c) The Royal Society of Chemistry, 2008

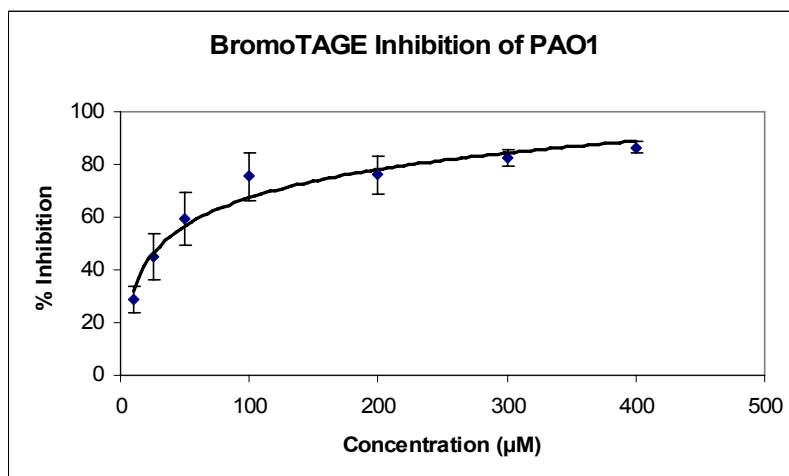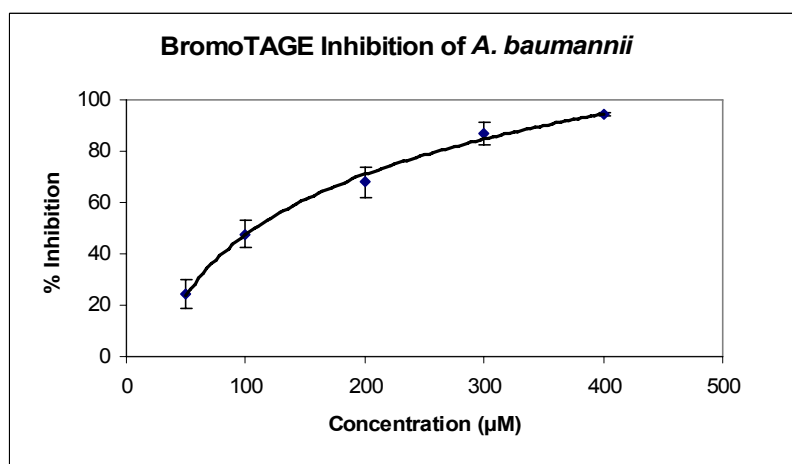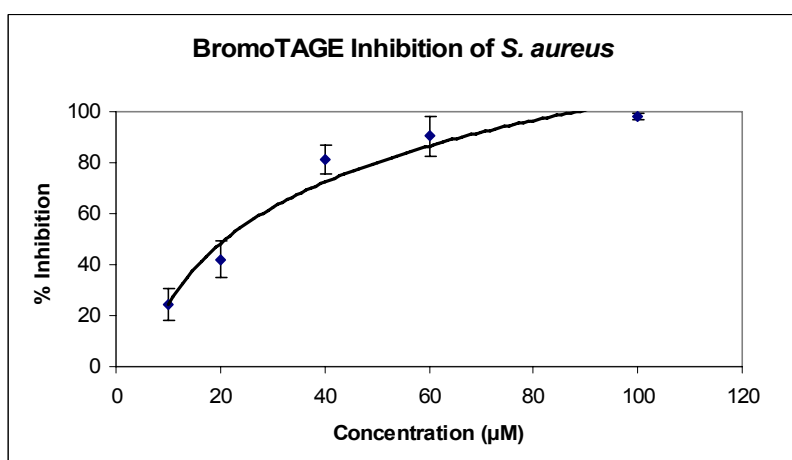

# Supplementary Material (ESI) for Molecular BioSystems  
# This journal is (c) The Royal Society of Chemistry, 2008

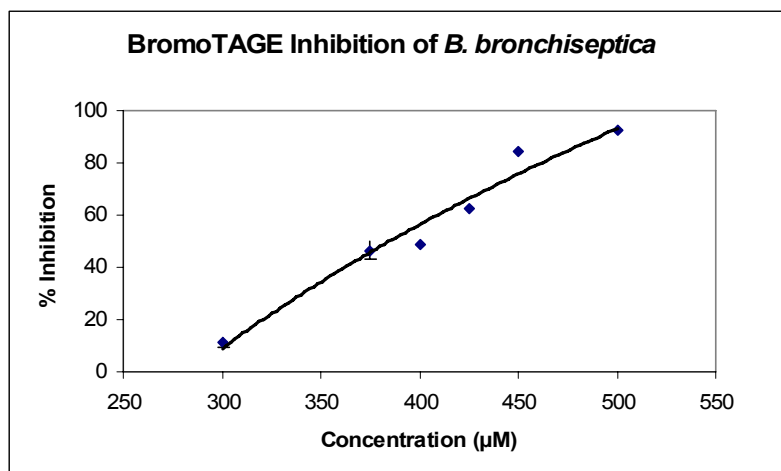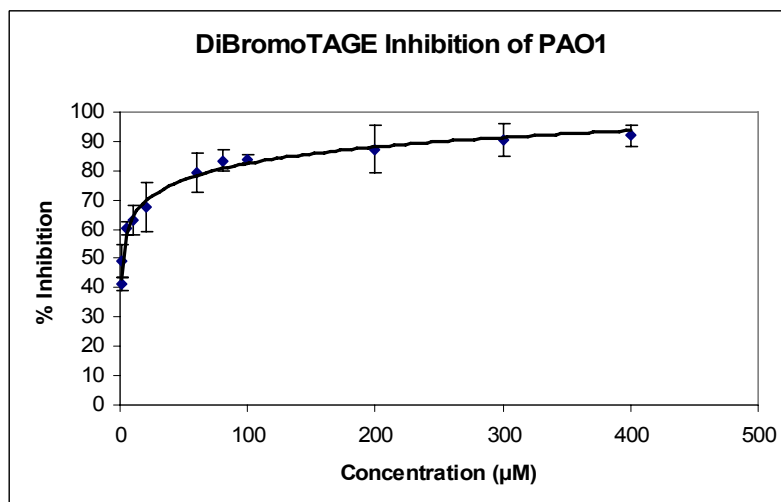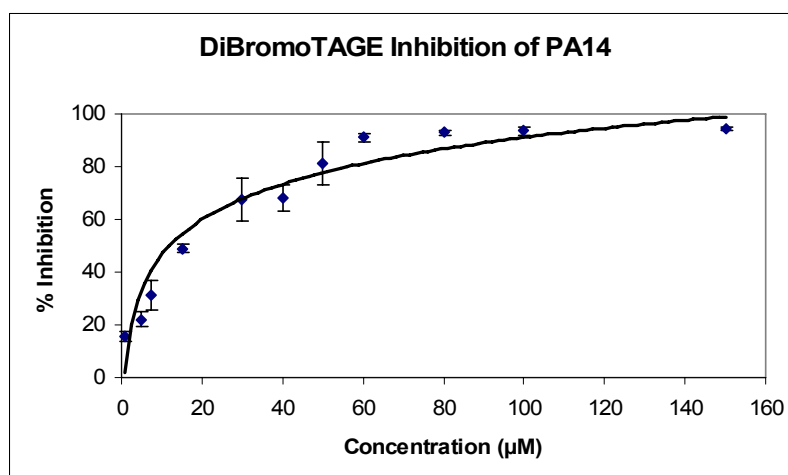

# Supplementary Material (ESI) for Molecular BioSystems  
# This journal is (c) The Royal Society of Chemistry, 2008

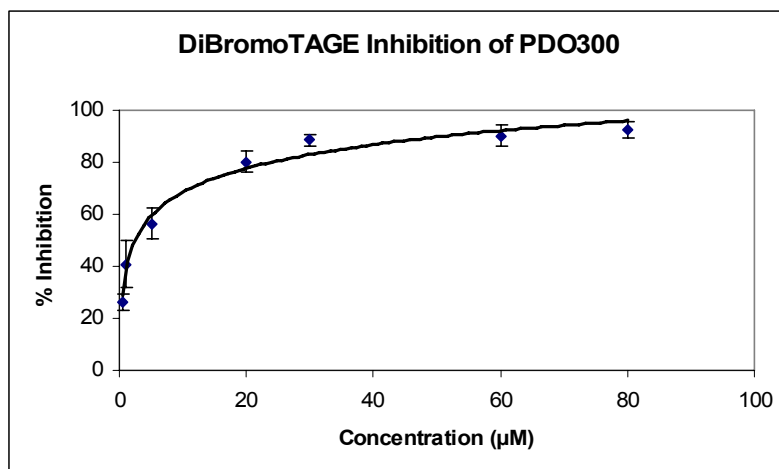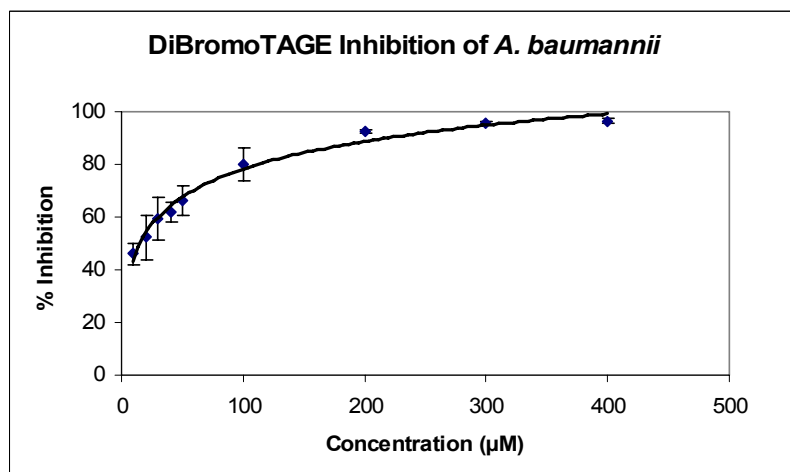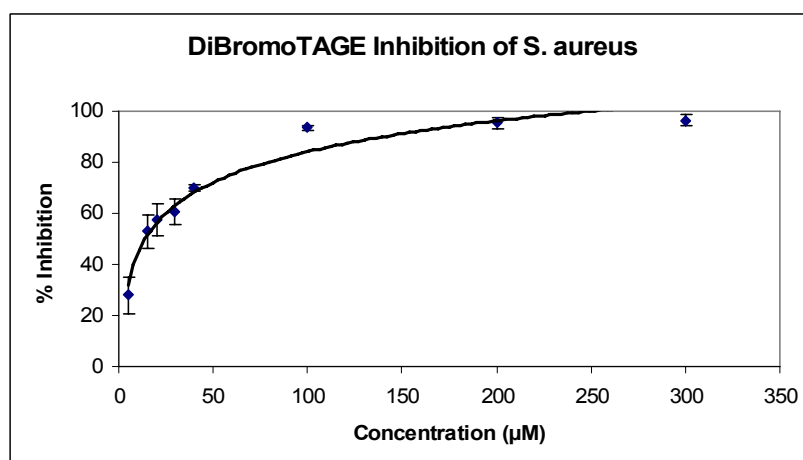

# Supplementary Material (ESI) for Molecular BioSystems  
# This journal is (c) The Royal Society of Chemistry, 2008

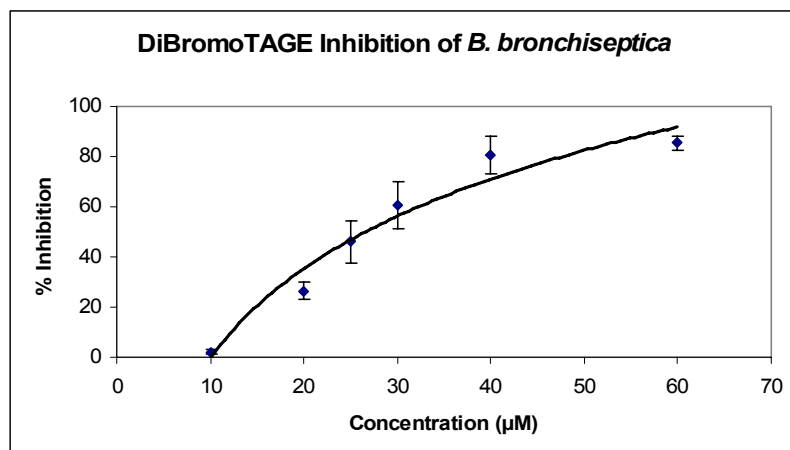

Growth Curves:

Growth curves against all strains discussed in this study were performed at the  $\text{IC}_{50}$  value of all active compounds.

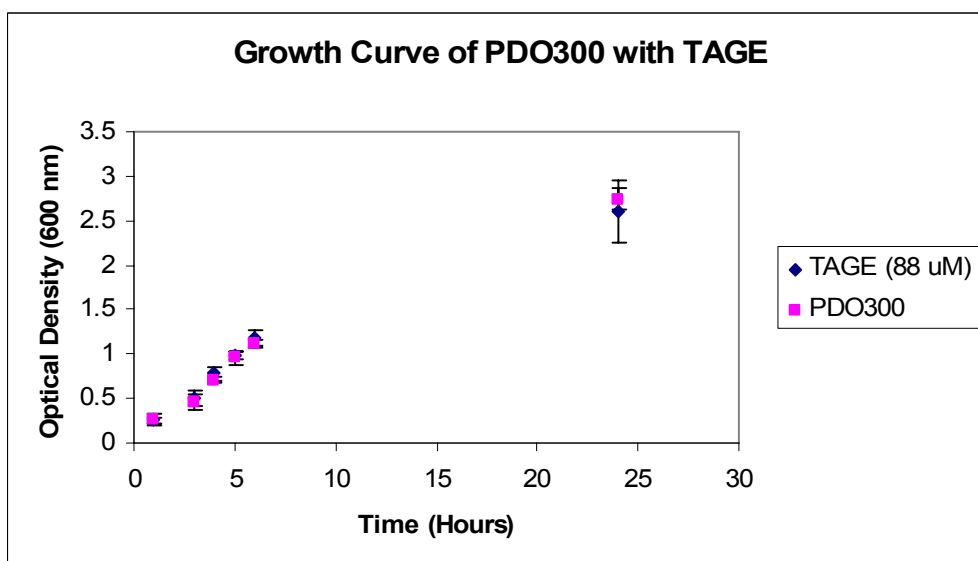

# Supplementary Material (ESI) for Molecular BioSystems  
# This journal is (c) The Royal Society of Chemistry, 2008

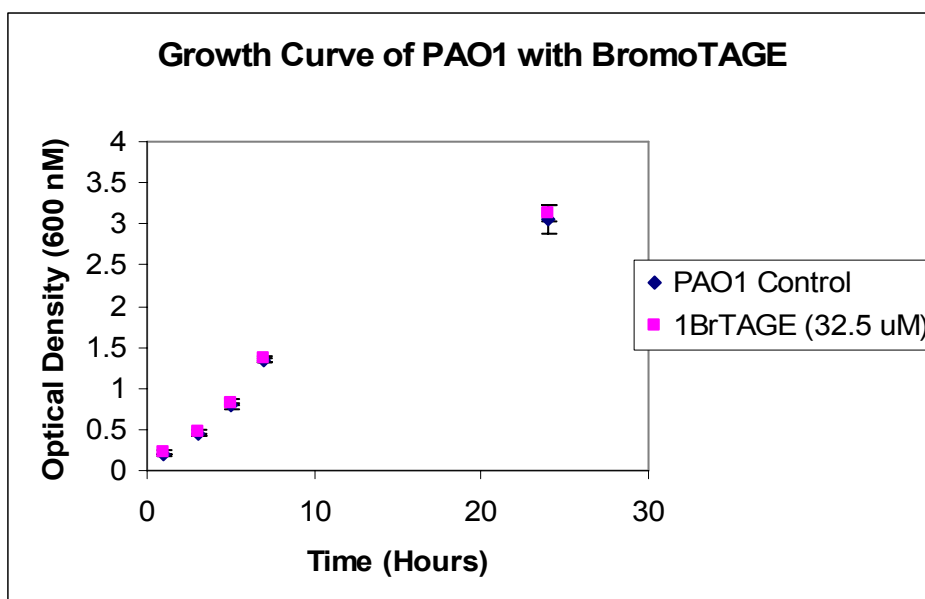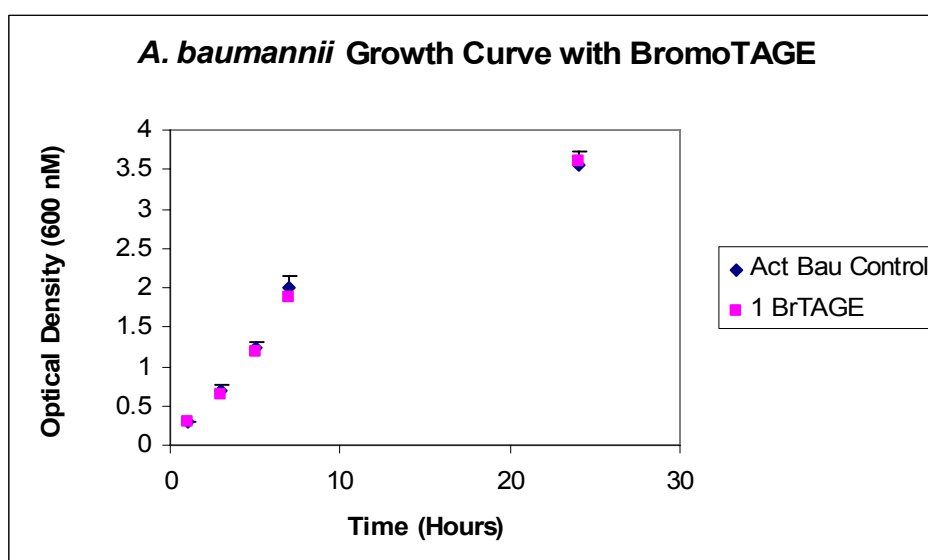

# Supplementary Material (ESI) for Molecular BioSystems  
# This journal is (c) The Royal Society of Chemistry, 2008

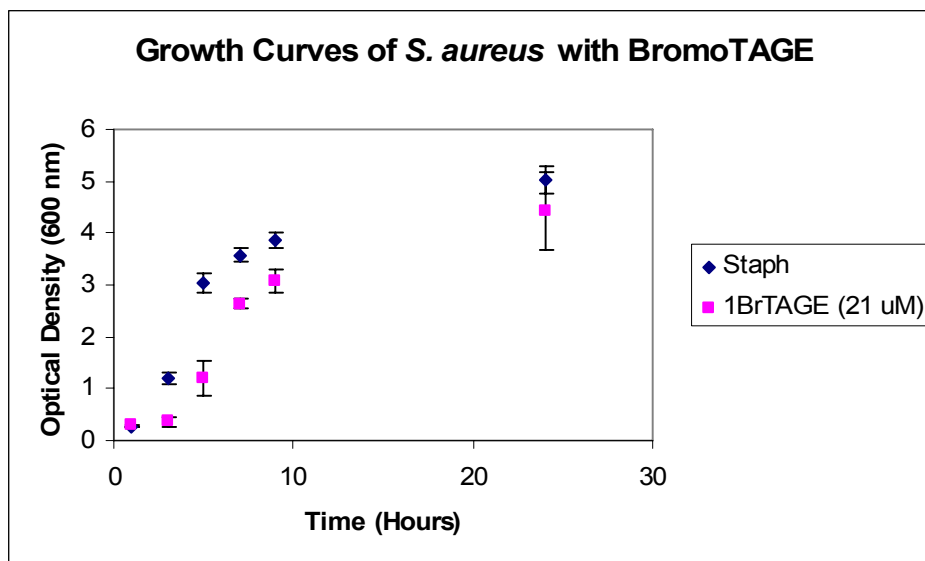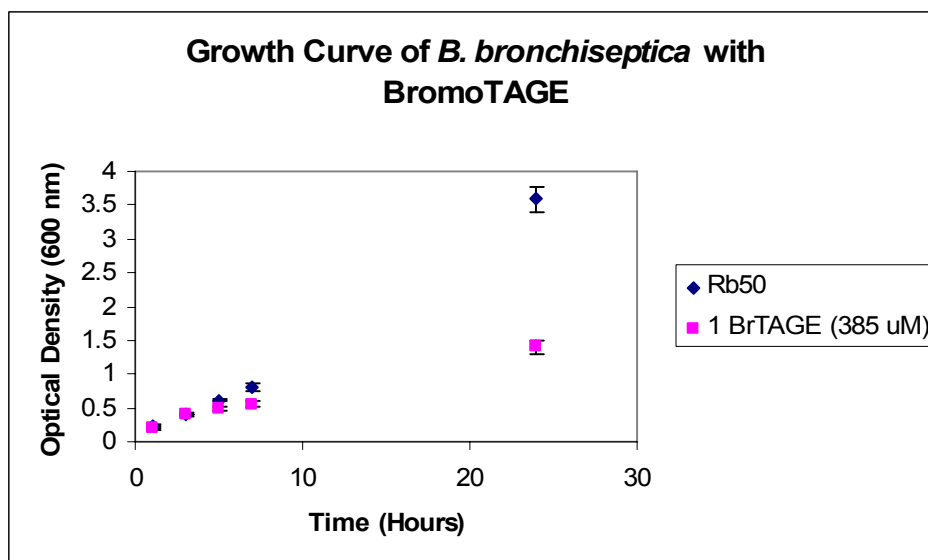

# Supplementary Material (ESI) for Molecular BioSystems  
# This journal is (c) The Royal Society of Chemistry, 2008

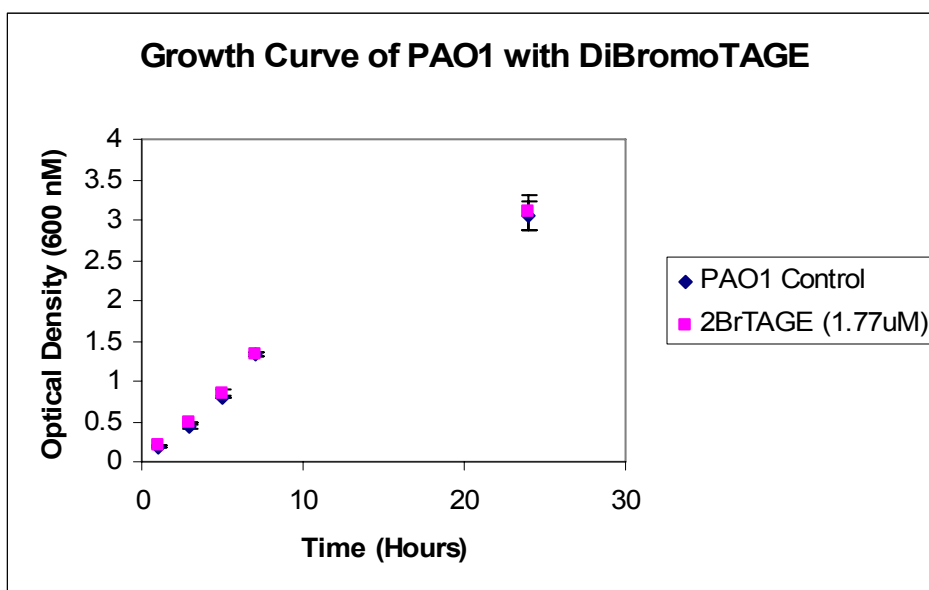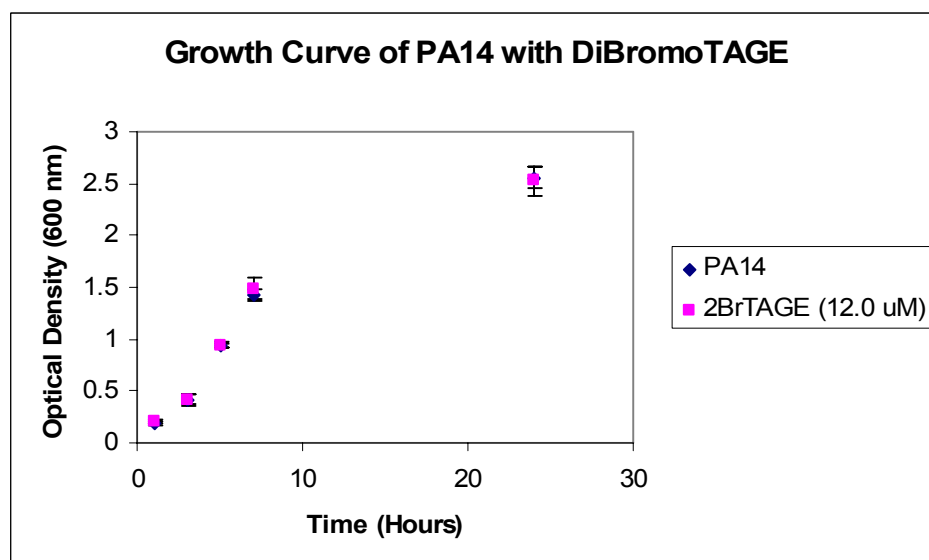



# Supplementary Material (ESI) for Molecular BioSystems  
# This journal is (c) The Royal Society of Chemistry, 2008

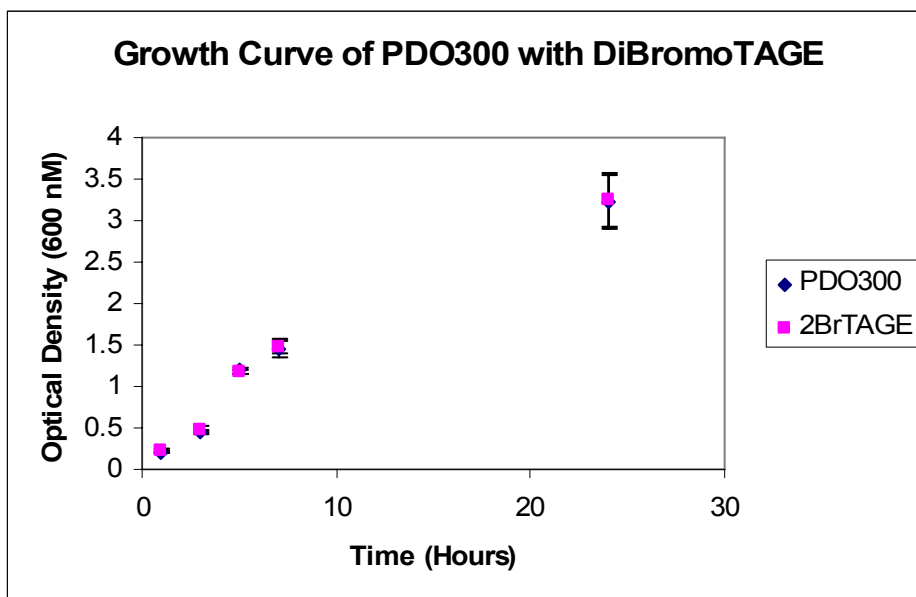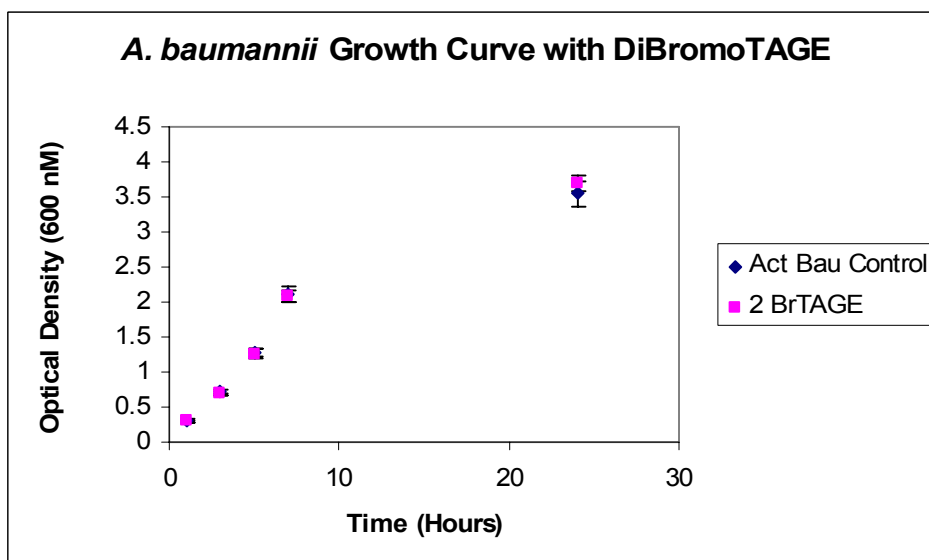

# Supplementary Material (ESI) for Molecular BioSystems  
# This journal is (c) The Royal Society of Chemistry, 2008

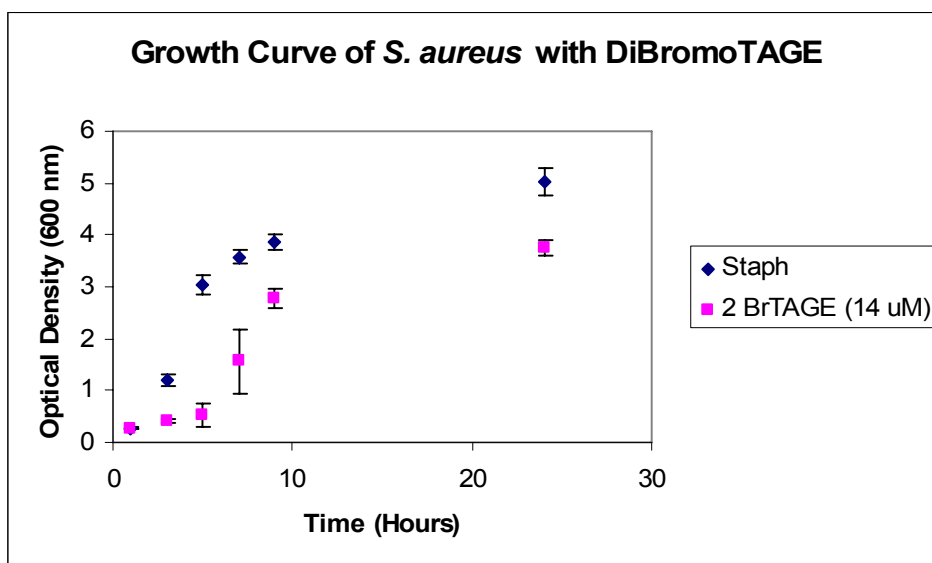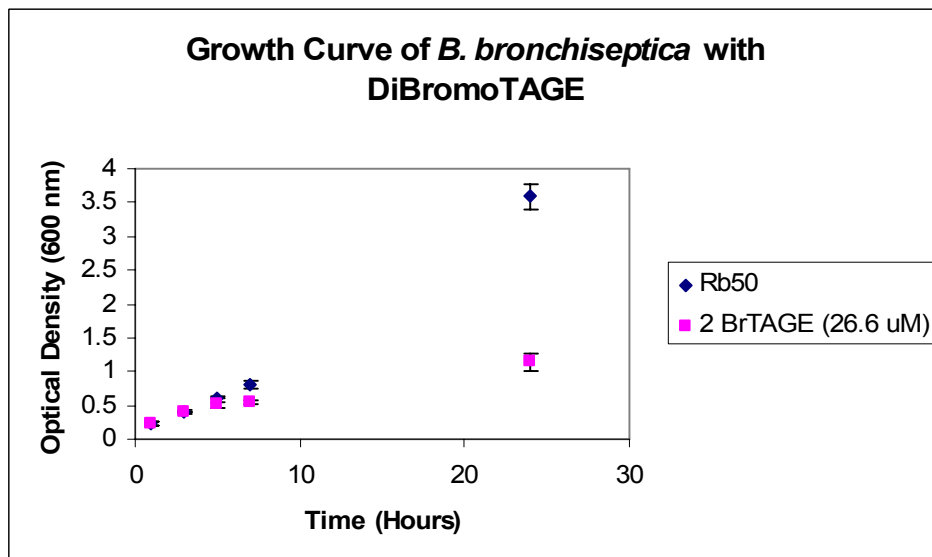

# Supplementary Material (ESI) for Molecular BioSystems  
# This journal is (c) The Royal Society of Chemistry, 2008

Colony Counts:

Colony Counts were performed on all *P. aeruginosa* strains in this study were performed at the IC<sub>50</sub> value of the active compounds reported. (BromoTAGE = BrTAGE, DiBromoTAGE = 2BrTAGE)

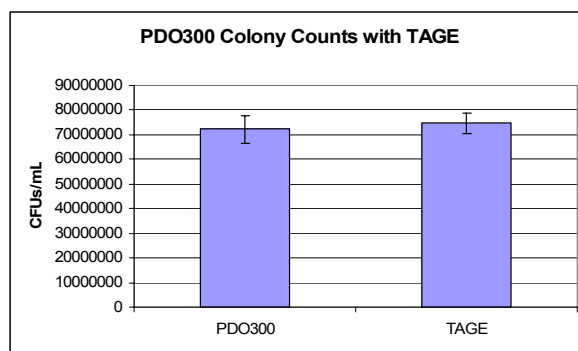

# Supplementary Material (ESI) for Molecular BioSystems  
# This journal is (c) The Royal Society of Chemistry, 2008

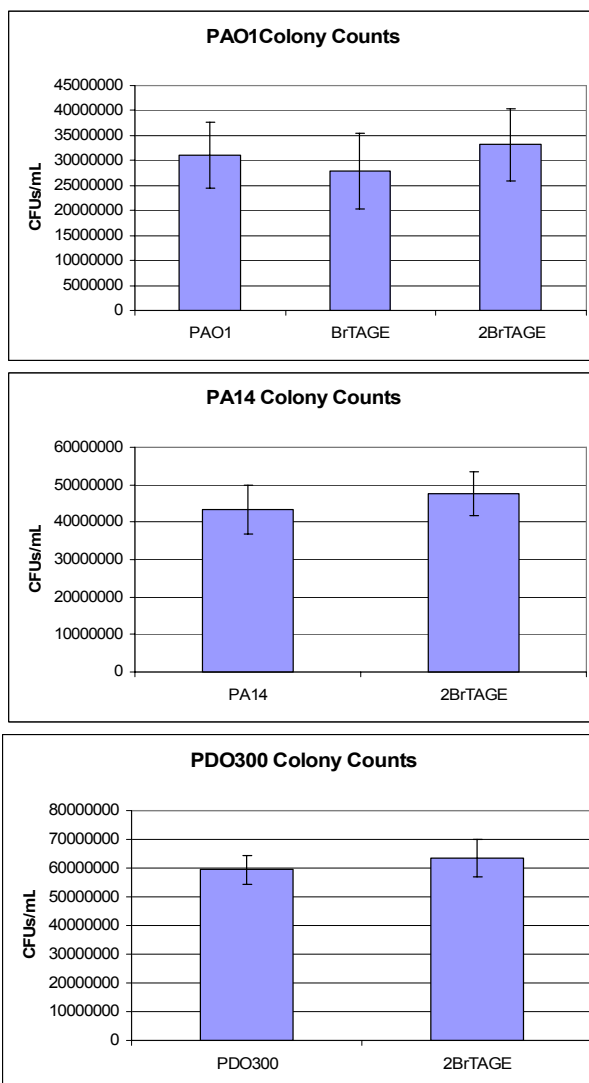

Dose-Response Curves for Dispersion:

# Supplementary Material (ESI) for Molecular BioSystems  
# This journal is (c) The Royal Society of Chemistry, 2008

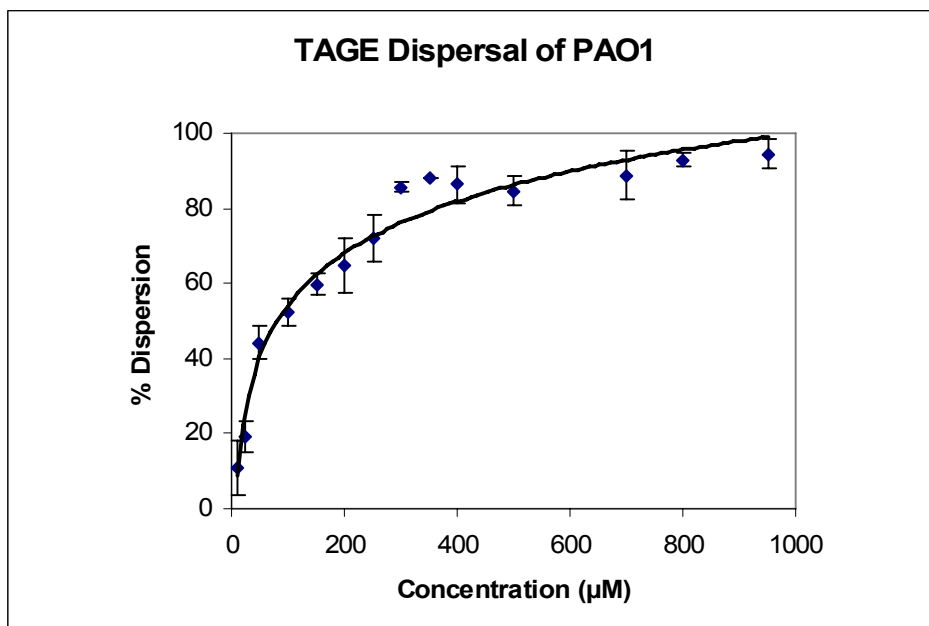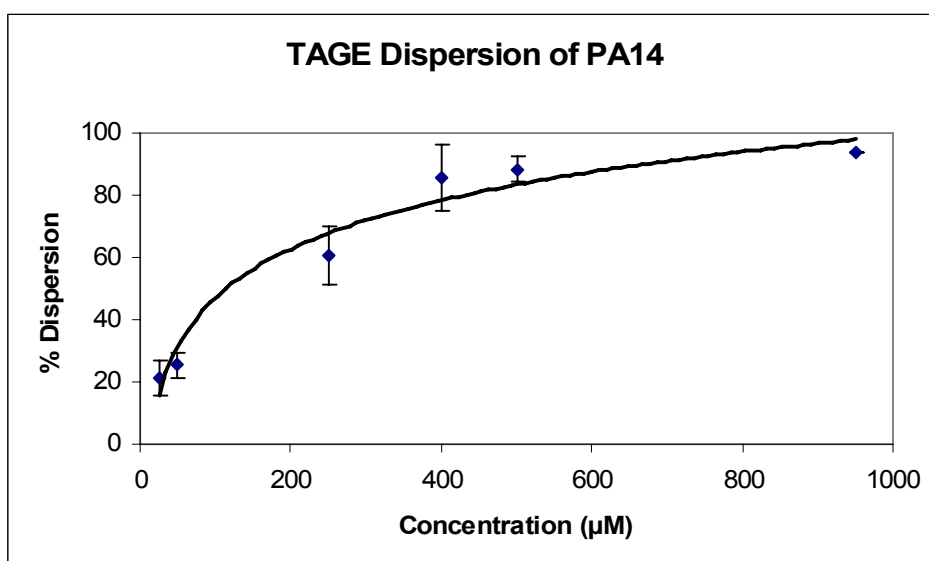

Supplement: b719989a.pdf [file b719989a.pdf]
